# Supplementary material for: Modelling filovirus maintenance in nature by experimental transmission of Marburg virus between Egyptian rousette bats
Source: Springer Nature journal article supplement (doi:10.1038/ncomms14446), 2017-02-13
Supplement: ncomms14446-s1.pdf [file ncomms14446-s1.pdf]

**Supplementary Table 1 | No difference in MARV RNA loads, duration of MARV RNA detection and peak MARV IgG antibody levels according to sex.**

| Parameter                                                                                                       | Males |                                   |     |                              |         | Females |                                   |     |                              |         | Mann-Whitney U<br>U p |        |
|-----------------------------------------------------------------------------------------------------------------|-------|-----------------------------------|-----|------------------------------|---------|---------|-----------------------------------|-----|------------------------------|---------|-----------------------|--------|
|                                                                                                                 | N     | Descriptive statistics<br>Mean SD |     | D'Agostino & Pearson<br>K2 p |         | N       | Descriptive statistics<br>Mean SD |     | D'Agostino & Pearson<br>K2 p |         |                       |        |
| Inoculated donor bats, MARV RNA loads (log <sub>10</sub> TCID <sub>50</sub> eq mL <sup>-1</sup> ), blood        | 35    | 2.0                               | 2.3 | 55.07                        | <0.0001 | 34      | 1.9                               | 2.2 | 63.9                         | 0.0001  | 575.0                 | 0.8161 |
| Inoculated donor bats, MARV RNA loads (log <sub>10</sub> TCID <sub>50</sub> eq mL <sup>-1</sup> ), oral swabs   | 24    | 4.1                               | 4.8 | 59.27                        | <0.0001 | 27      | 4.1                               | 4.6 | 64.25                        | <0.0001 | 284.0                 | 0.4593 |
| Inoculated donor bats, MARV RNA loads (log <sub>10</sub> TCID <sub>50</sub> eq mL <sup>-1</sup> ), rectal swabs | 2     | NNS                               | NNS | NNS                          | NNS     | 4       | NNS                               | NNS | NNS                          | NNS     | NA                    | NA     |
| Inoculated donor bats, duration of MARV RNA detection (days), blood                                             | 7     | 5.0                               | 2.8 | NNS                          | NNS     | 5       | 7.0                               | 2.2 | NNS                          | NNS     | NA                    | NA     |
| Inoculated donor bats, duration of MARV RNA detection (days), oral swabs                                        | 7     | 3.4                               | 3.3 | NNS                          | NNS     | 5       | 5.4                               | 3.4 | NNS                          | NNS     | NA                    | NA     |
| Inoculated donor bats, duration of MARV RNA detection (days), rectal swabs                                      | 7     | 0.3                               | 0.8 | NNS                          | NNS     | 5       | 0.8                               | 0.8 | NNS                          | NNS     | NA                    | NA     |
| Inoculated donor bats, peak MARV IgG antibody levels (sum OD)                                                   | 7     | 2.9                               | 1.0 | NNS                          | NNS     | 5       | 3.7                               | 1.0 | NNS                          | NNS     | NA                    | NA     |
| Naïve contact bats, peak MARV IgG antibody levels (sum OD)                                                      | 3     | NNS                               | NNS | NNS                          | NNS     | 6       | 1.9                               | 0.8 | NNS                          | NNS     | NA                    | NA     |

NNS: Number not sufficient, NA: Not appropriate.

**Supplementary Table 2 | Urine collection attempts from inoculated donor bats.**

| Bat              | DPI  |      |      |      |      |      |      |      |      |       |       |       |      |      |       |       |      |      |      |      |      |      |      |      |      |      |      |      |      |      |      |
|------------------|------|------|------|------|------|------|------|------|------|-------|-------|-------|------|------|-------|-------|------|------|------|------|------|------|------|------|------|------|------|------|------|------|------|
|                  | 1    | 2    | 3    | 4    | 5    | 6    | 7    | 8    | 9    | 10    | 11    | 12    | 13   | 14   | 15    | 16    | 17   | 18   | 19   | 20   | 21   | 22   | 23   | 24   | 25   | 28   | 35   | 42   | 49   | 56   |      |
| 214605<br>(1 ID) | Gray | Gray |      | Gray | Gray |      |      | Gray | Gray | Gray  | Gray  |       |      |      |       | Gray  |      | Gray | Gray | Gray | Gray | Gray | Gray |      |      | Gray | Gray | Gray | Gray | Gray |      |
| 220235<br>(1 ID) |      |      |      | Gray | Gray |      | Gray | Gray | Gray | Gray  | Gray  |       | Gray | Gray |       | Gray  | Gray | Gray | Gray | Gray | Gray | Gray | Gray |      | Gray |      | Gray | Gray | Gray | Gray |      |
| 220599<br>(1 ID) | Gray |      |      |      |      |      |      |      | Gray |       |       |       | Gray |      |       |       | Gray |      |      |      |      |      |      |      |      |      |      |      |      |      |      |
| 550417<br>(1 ID) |      | Gray |      |      |      |      |      |      |      | Black | Black | Black | Gray |      | Black | Black |      |      | Gray |      |      |      | Gray | Gray | Gray |      | Gray |      |      |      |      |
| 642999<br>(3 ID) |      |      |      | Gray |      |      |      | Gray |      |       |       |       |      |      |       |       |      |      |      |      |      |      |      |      |      |      |      |      |      | Gray |      |
| 656429<br>(3 ID) | Gray | Gray | Gray | Gray |      |      |      |      |      |       |       |       |      |      |       |       |      |      |      |      |      |      | Gray | Gray |      |      |      |      |      |      |      |
| 685891<br>(3 ID) | Gray | Gray |      |      |      |      |      | Gray |      |       |       |       | Gray |      | Gray  | Black |      |      | Gray |      | Gray |      | Gray | Gray |      |      |      | Gray | Gray | Gray |      |
| 685787<br>(3 ID) | Gray |      | Gray |      |      |      |      |      |      |       |       |       |      |      |       |       |      |      |      |      |      |      |      |      |      |      |      |      |      |      |      |
| 685734<br>(5 ID) |      |      |      |      |      |      |      |      |      |       |       | Gray  |      |      |       | Gray  | Gray |      |      |      |      |      |      |      |      |      |      | Gray | Gray | Gray | Gray |
| 686146<br>(5 ID) |      | Gray | Gray |      | Gray | Gray |      |      |      |       |       |       |      |      |       |       |      |      |      | Gray |      |      |      | Gray |      |      |      | Gray | Gray | Gray |      |
| 691198<br>(5 ID) | Gray | Gray |      |      |      |      |      |      |      |       |       |       |      |      |       |       |      |      |      |      |      | Gray | Gray | Gray |      | Gray |      | Gray | Gray | Gray |      |
| 720561<br>(5 ID) |      |      |      |      | Gray |      |      |      |      | Gray  |       |       |      |      |       |       |      |      |      |      |      | Gray |      |      |      |      |      |      |      |      |      |

Times shaded in gray indicate successful urine collection attempts and times shaded in black indicate MARV RNA positive specimens. The housing unit (1-6) and group (inoculated donor-ID) during the early study phase is indicated following the identification number of each bat.

**Supplementary Table 3 | Primers and probes.**

| <b>Name</b>                                  | <b>Sequence (5' to 3')</b>                                          |
|----------------------------------------------|---------------------------------------------------------------------|
| <b>Marburg virus viral protein 40 gene</b>   |                                                                     |
| Forward primer                               | GGA CCA CTG CTG GCC ATA TC                                          |
| Reverse primer                               | GAG AAC ATI TCG GCA GGA AG                                          |
| Probe 1                                      | <i>56-FAM-ATC CTA AAC-ZEN-AGG CTT GTC TTC TCT GGG ACT T-3IABkFQ</i> |
| Probe 2                                      | <i>56-FAM-ATC CTG AAT-ZEN-AAG CTC GTC TTC TCT GGG ACT T-3IABkFQ</i> |
| <b>Rift Valley fever virus large segment</b> |                                                                     |
| Forward primer                               | TGA AAA TTC CTG AGA CAC ATG G                                       |
| Reverse primer                               | ACT TCC TTG CAT CAT CTG ATG                                         |
| Probe                                        | <i>FAM-CAC AAG TCC ACA CAG GCC CCT TAC ATT G-BHQ1</i>               |
